# Supplementary material for: The Long-Term Culture of Human Fibroblasts Reveals a Spectroscopic Signature of Senescence
Source: MDPI journal article supplement (doi:10.3390/ijms23105830), 2022-05-23
Supplement: s1 [file s1]

A.

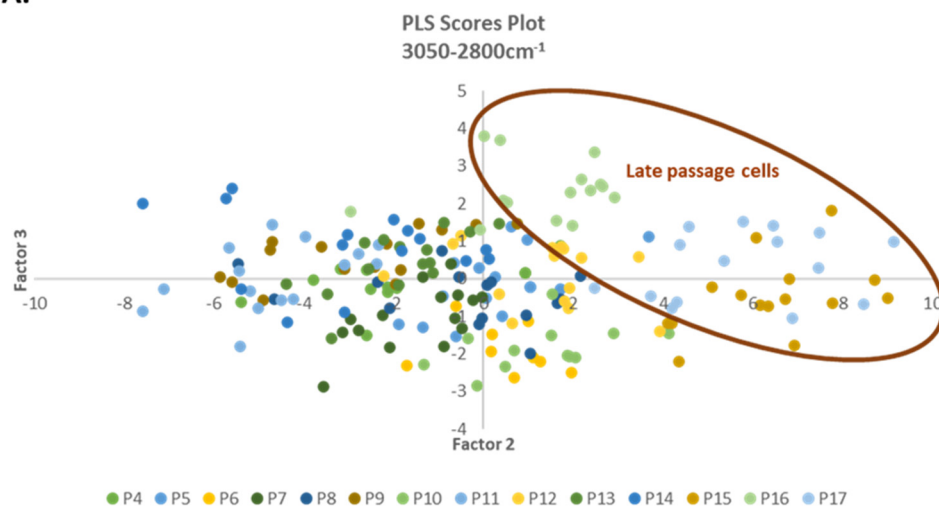

B.

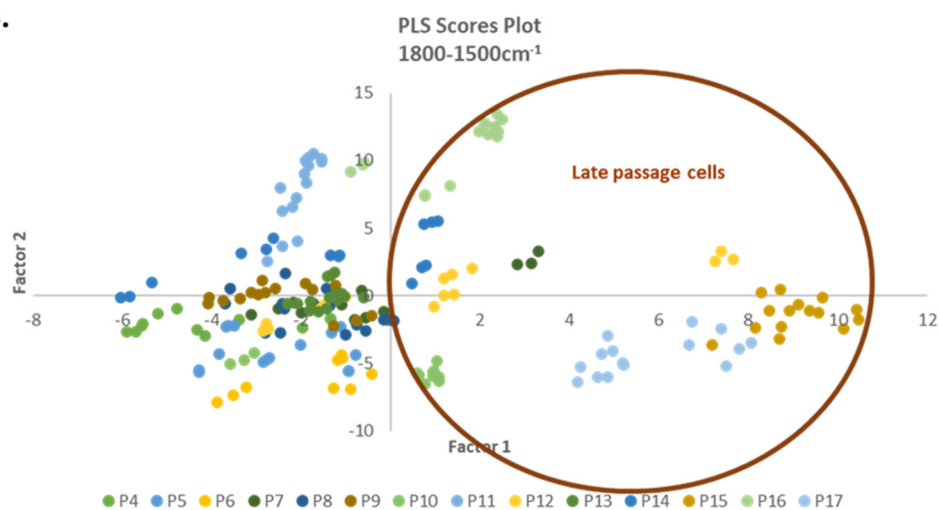

C.

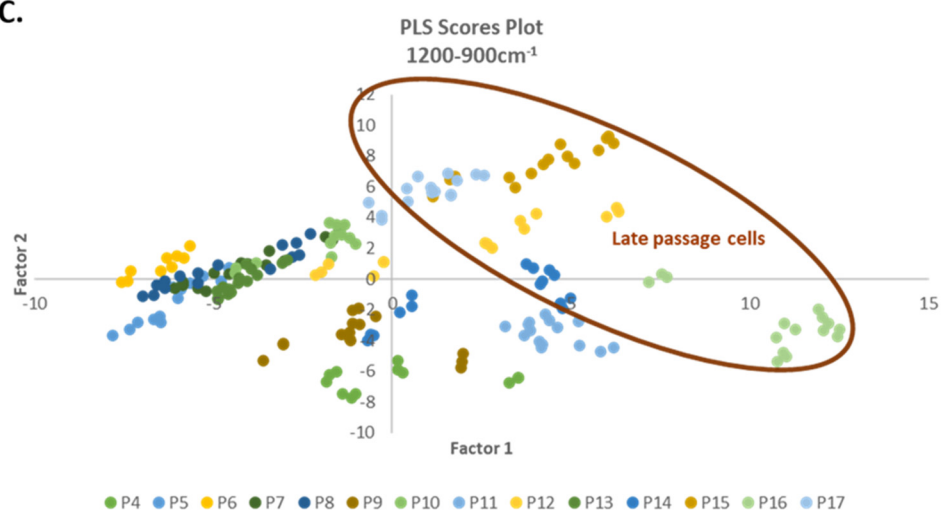

Figure S1: PLS Scores Plot for cells from passages 4 to 17 in the A. 3050-2800cm<sup>-1</sup>, B. 1800-1500cm<sup>-1</sup> and C. 1200-900cm<sup>-1</sup> spectral regions.

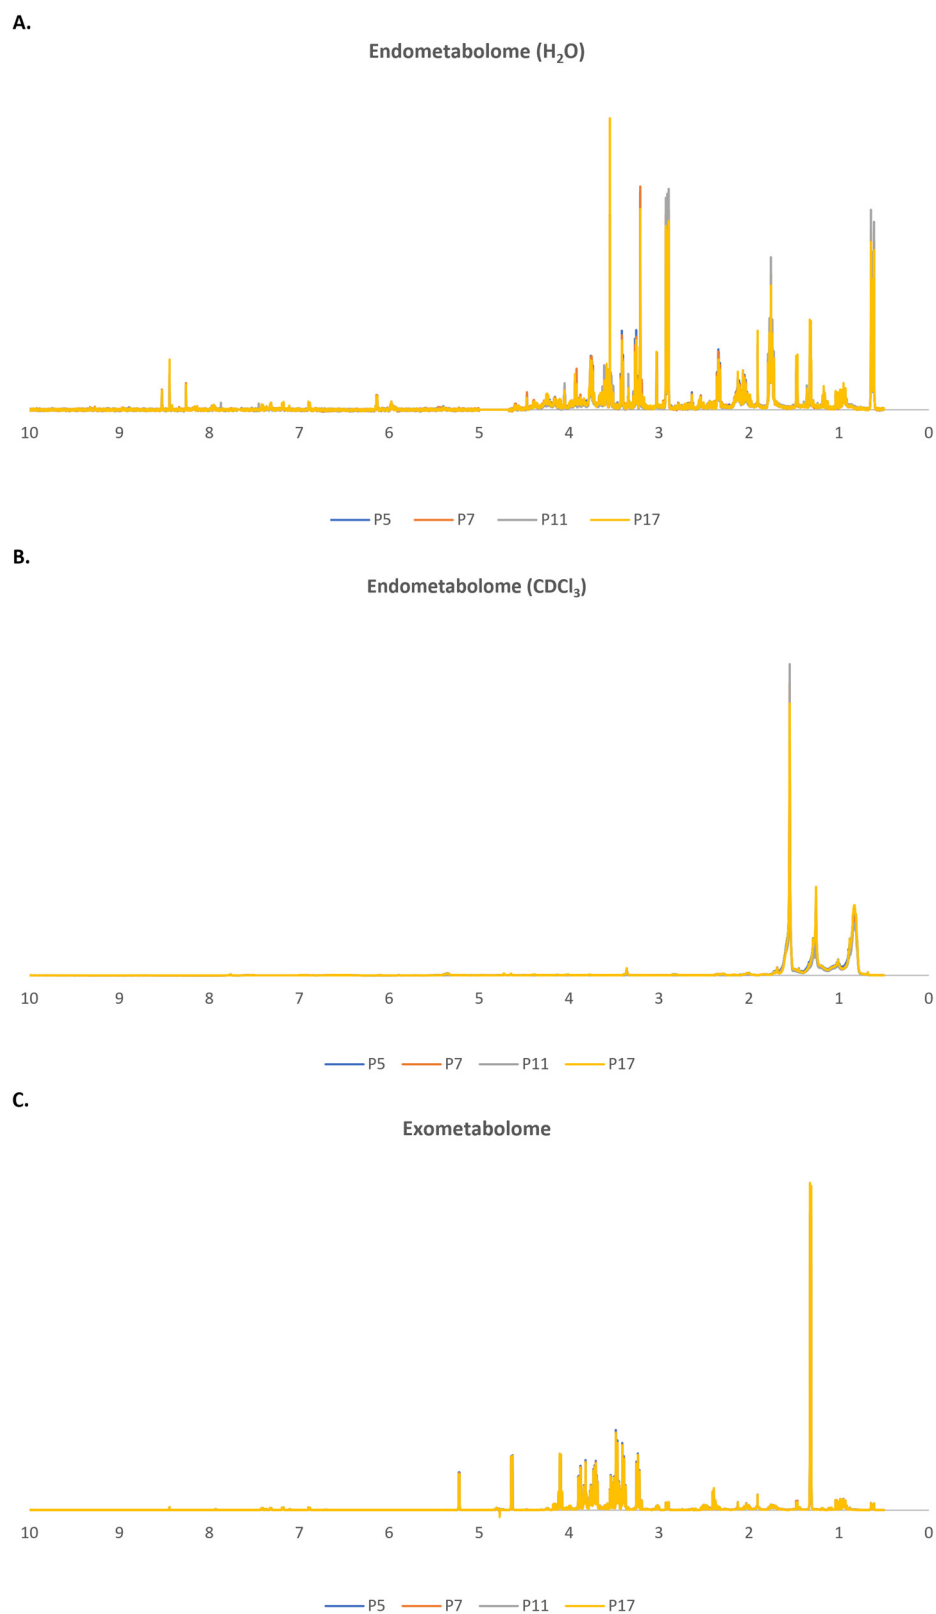

**Figure S2: Representative NMR spectra** of aqueous endometabolome (A), lipidic endometabolome (B) and exometabolome (C) of dermal fibroblasts at passages 5, 7, 11 and 17.

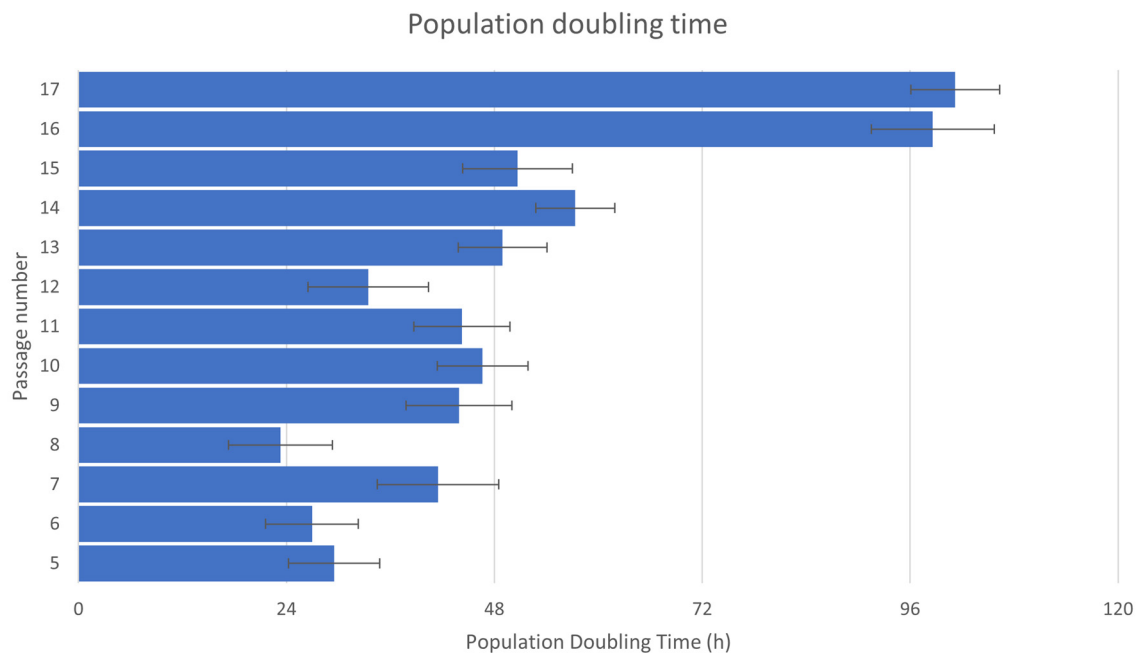

**Figure S3: Population doubling time of human dermal fibroblasts from passages 5 to 17** (AG22153, NIA Aging Cell Culture Repository, Apparently Healthy Collection, Coriell Institute for Medical Research, New Jersey, USA). Population doubling time was calculated using the formula:  $PDT = D \cdot (\ln(2) / \ln(CF/CI))$ , according to the literature [31]. Data is presented as mean  $\pm$  standard deviation. PDT = population doubling time; D = duration of cell culture, in hours; CF = final concentration of cells (cells/mL); CI = initial concentration of cells (cells/mL).
